# Supplementary material for: Arrangement of palladium nanoparticles templated by supramolecular self-assembly of SDS wrapped on single-walled carbon nanotubes
Source: Royal Society of Chemistry journal article supplement (doi:10.1039/c0cc00099j), 2010-01-01
Supplement: c0cc00099j.pdf [file c0cc00099j.pdf]

Supplementary Material (ESI) for Chemical Communications  
This journal is (c) The Royal Society of Chemistry 2010

Supporting Information

**Arrangement of Palladium Nanoparticles Templated by Supramolecular Self-Assembly  
of SDS Wrapped on Single-Walled Carbon Nanotubes**

*Zhenquan Tan\*, Hiroya Abe, Makio Naito and Satoshi Ohara*

Joining and Welding Research Institute, Osaka University, 11-1 Mihogaoka, Ibaraki, Osaka  
567-0047 (Japan)

E-mail: zq-tan@jwri.osaka-u.ac.jp

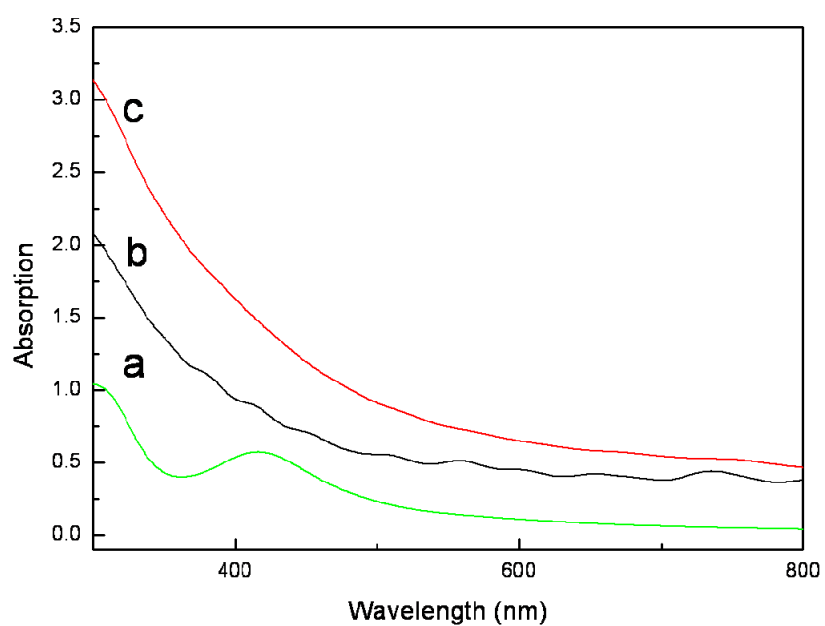

Figure S1. UV-Vis absorption spectrum of (a) Palladium chloride aqueous solution, (b) SDS-functionalized SWCNTs aqueous dispersion and (c) Pd nanoparticles decorated SWCNTs aqueous dispersion.

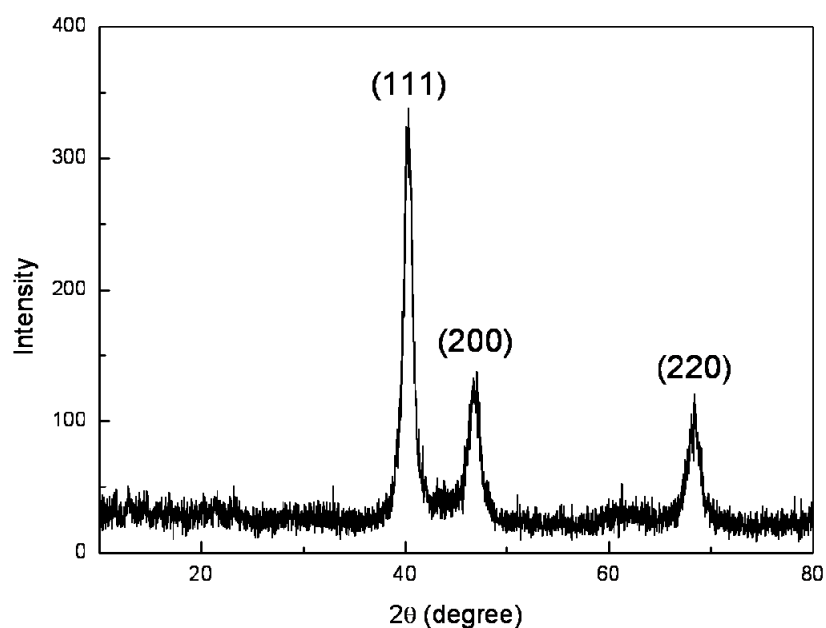

**Figure S2.** XRD profile of SWCNT supported Pd nanoparticles measured by JDX-3530M XRD system (JEOL). The SWCNTs supported Pd nanoparticles revealed three diffraction peaks at  $2\theta = 40.3, 46.7$  and  $68.4^\circ$  (Fig. 5), which are assigned to the (111), (200) and (220) planes, respectively. The lattice parameters of the Pd nanoparticles evaluated by the XRD measurement were determined to be 0.388 nm, which is in agreement with the standard value (0.389 nm).
